# Supplementary material for: Synthesis and characterisation of neutral mononuclear cuprous complexes based on dipyrrin derivatives and phosphine mixed-ligands
Source: Royal Society of Chemistry journal article supplement (doi:10.1039/c2dt30618b), 2012-01-01
Supplement: c2dt30618b.pdf [file c2dt30618b.pdf]

## Supplementary material

### Synthesis and characterisation of neutral mononuclear cuprous complexes based on dipyrin derivative and phosphine mixed-ligands

Xiaohui Liu, Hongmei Nan, Wei Sun, Qikai Zhang, Mingjian Zhan, Luyi Zou, Zhiyuan Xie, Xiao Li, Canzhong Lu, and Yanxiang Cheng

#### CONTENTS

**S2-S4.** Figures S1-13. Absorption and emission spectra of the complexes in CH<sub>2</sub>Cl<sub>2</sub>.

**S4.** Figures S14. Absorption and emission spectra of borondifluoride compound of ligand **1** in CH<sub>2</sub>Cl<sub>2</sub>.

**S4.** Figures S15. Absorption and emission spectra of free ligand **1** and the corresponding complex **1b** in CH<sub>2</sub>Cl<sub>2</sub>.

**S5.** Figures S16-22. Cyclic voltammogram of the complexes and their ligands in CH<sub>2</sub>Cl<sub>2</sub> (at 50 mV s<sup>-1</sup>).

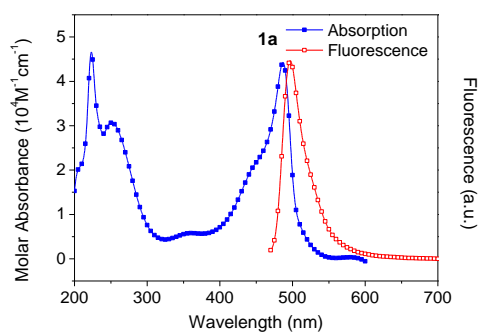

Figure S1. Absorption and emission spectra of 1a

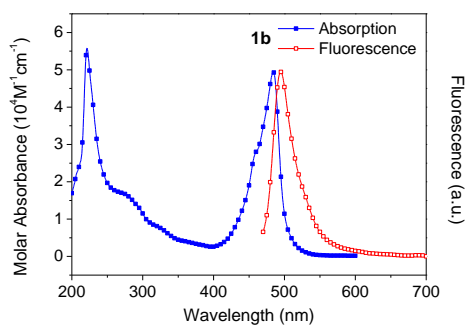

Figure S2. Absorption and emission spectra of 1b

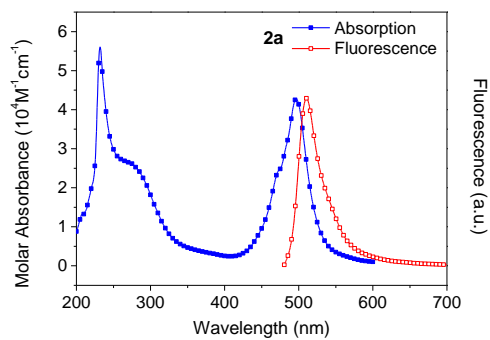

Figure S3. Absorption and emission spectra of 2a

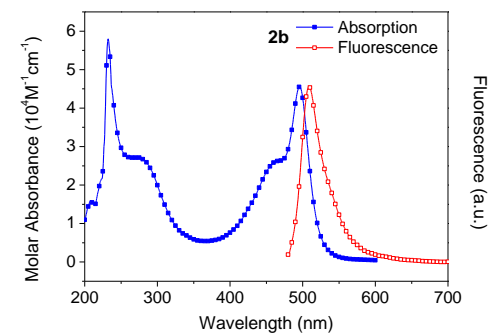

Figure S4. Absorption and emission spectra of 2b

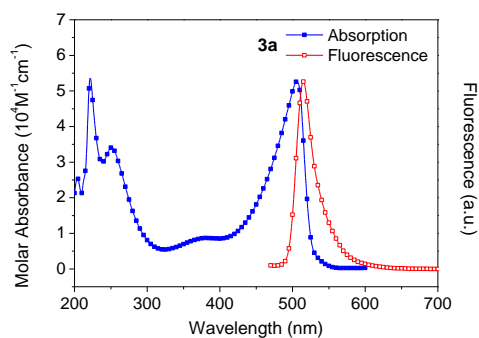

Figure S5. Absorption and emission spectra of 3a

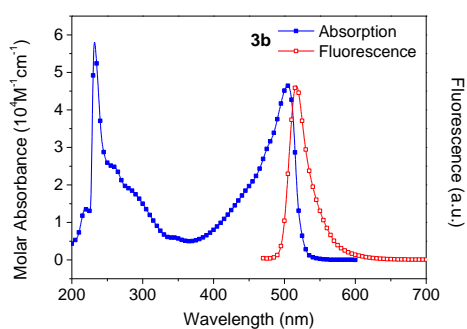

Figure S6. Absorption and emission spectra of 3b

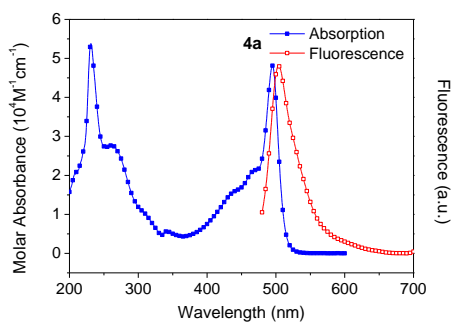

Figure S7. Absorption and emission spectra of 4a

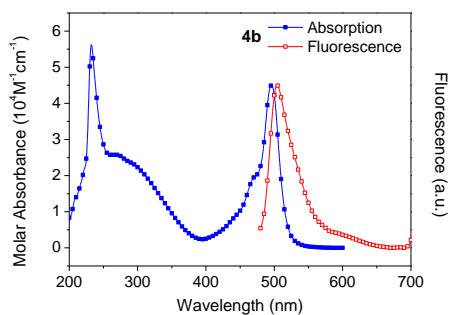

Figure S8. Absorption and emission spectra of 4b

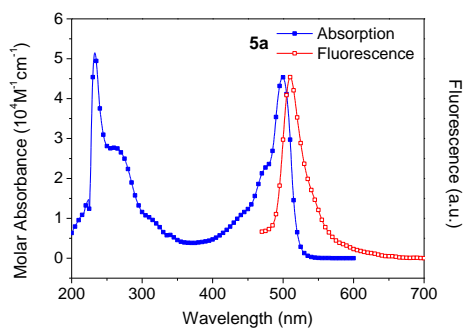

Figure S9. Absorption and emission spectra of 5a

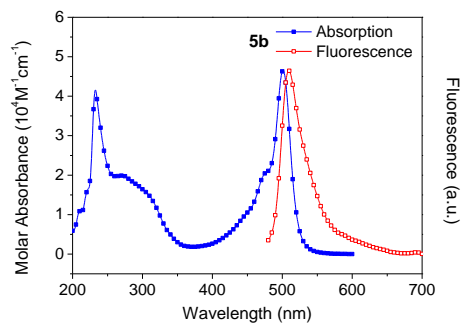

Figure S10. Absorption and emission spectra of 5b

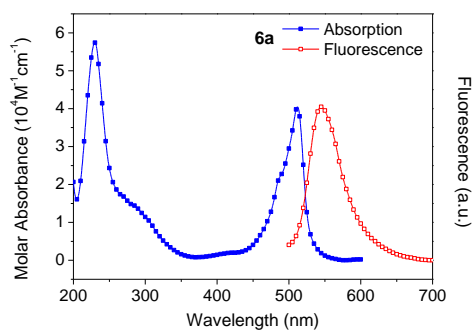

Figure S11. Absorption and emission spectra of 6a

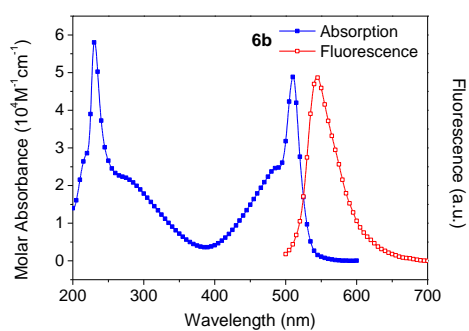

Figure S12. Absorption and emission spectra of 6b

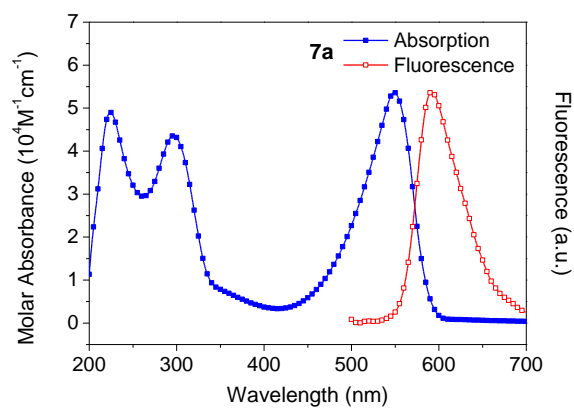

**Figure S13.** Absorption and emission spectra of **7a**

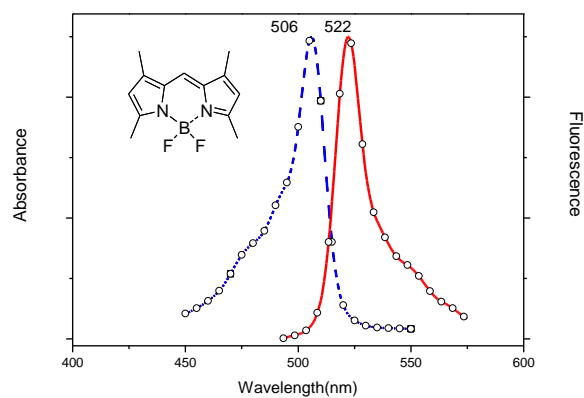

**Figure S14.** Absorption and emission spectra of borondifluoride compound of ligand **1**

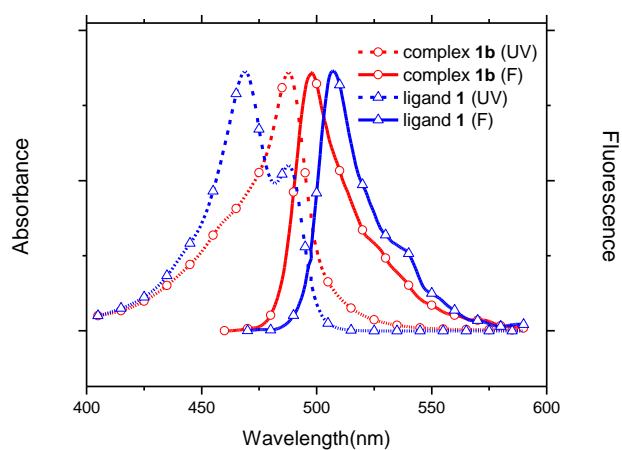

**Figure S15.** Absorption and emission spectra of free ligand **1** and the corresponding complex **1b**

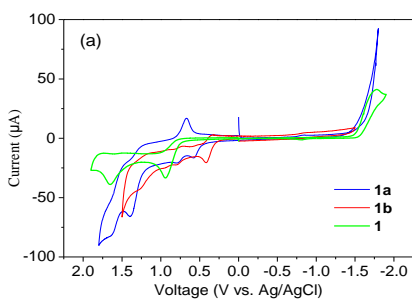

Figure S16. CVs of the complexes **1a**, **1b** and ligand **1**.

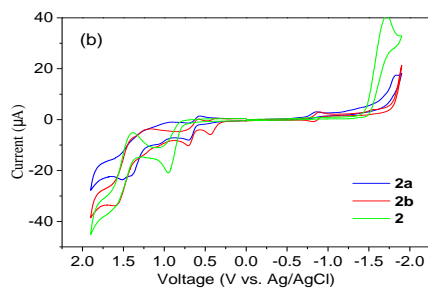

Figure S17. CVs of the complexes **2a**, **2b** and ligand **2**.

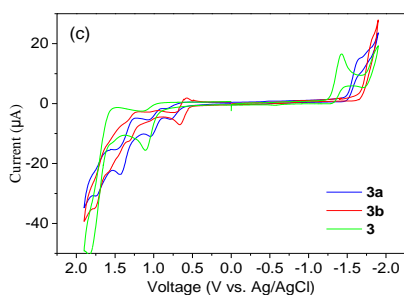

Figure S18. CVs of the complexes **3a**, **3b** and ligand **3**.

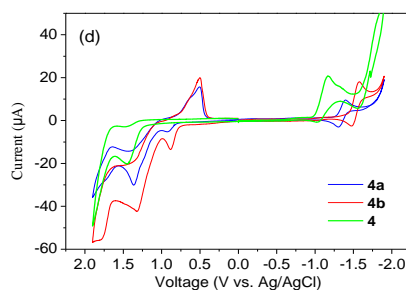

Figure S19. CVs of the complexes **4a**, **4b** and ligand **4**.

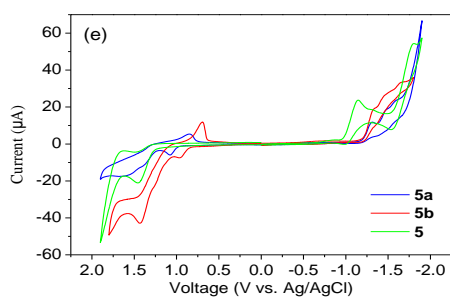

Figure S20. CVs of the complexes **5a**, **5b** and ligand **5**.

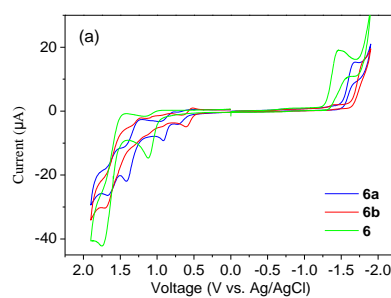

Figure S21. CVs of the complexes **6a**, **6b** and ligand **6**.

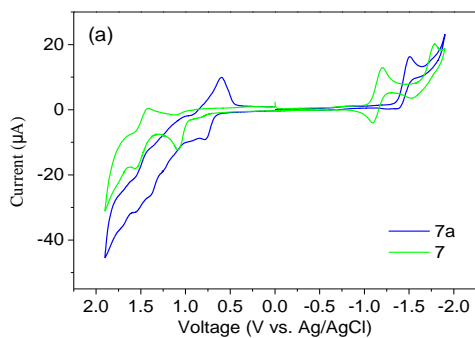

Figure S22. CVs of the complex **7a** and ligand **7**.
